# Supplementary material for: ACVR1, a Therapeutic Target of Fibrodysplasia Ossificans Progressiva, Is Negatively Regulated by miR-148a
Source: Int J Mol Sci. 2012 Feb 15;13(2):2063–77. doi: 10.3390/ijms13022063 (PMC3292007; doi:10.3390/ijms13022063)
Supplement: Supplementary file 1 [file ijms-13-02063-s001.pdf]

## Supplementary Materials

**Table S1.** The miRNA list that could potentially target ACVR1 3' UTR. Targetscan, miRanda and miRDB were used for prediction and the miRNAs that could be predicted by all the three programs are shown below.

| MicroRNA name   |
|-----------------|
| hsa-miR-130a    |
| hsa-miR-130b    |
| hsa-miR-137     |
| hsa-miR-148a    |
| hsa-miR-148b    |
| hsa-miR-152     |
| hsa-miR-182     |
| hsa-miR-193a-5p |
| hsa-miR-197     |
| hsa-miR-220b    |
| hsa-miR-301a    |
| hsa-miR-301b    |
| hsa-miR-30a     |
| hsa-miR-30b     |
| hsa-miR-30c     |
| hsa-miR-30d     |
| hsa-miR-30e     |
| hsa-miR-330-3p  |
| hsa-miR-365     |
| hsa-miR-384     |
| hsa-miR-448     |
| hsa-miR-450b-5p |
| hsa-miR-454     |
| hsa-miR-518a-5p |
| hsa-miR-519a    |
| hsa-miR-519b-3p |
| hsa-miR-519c-3p |
| hsa-miR-527     |
| hsa-miR-548n    |
| hsa-miR-568     |
| hsa-miR-586     |
| hsa-miR-606     |
| hsa-miR-651     |
